# Supplementary material for: Trehalose Restrains the Fibril Load towards α-Lactalbumin Aggregation and Halts Fibrillation in a Concentration-Dependent Manner
Source: PubMed Central journal article supplement (PMC8001226; doi:10.3390/biom11030414), 2021-03-11
Supplement: biomolecules-11-00414-s001.pdf [file biomolecules-11-00414-s001.pdf]

## Supplementary Materials

# Trehalose restrains fibril load towards $\alpha$ -lactalbumin aggregation and halts fibrillation in a concentration-dependent manner

Sania Bashir<sup>1</sup>, Ishfaq Ahmad Ahanger<sup>1,2</sup>, Anas Shamsi<sup>1,3</sup>, Mohamed F. Alajmi<sup>4</sup>, Afzal Hussain<sup>4</sup>,  
Hani Chaudhary<sup>5</sup>, Faizan Ahmad<sup>1</sup>, Md. Imtaiyaz Hassan<sup>1</sup> and Asimul Islam<sup>1\*</sup>

<sup>1</sup>Centre for Interdisciplinary Research in Basic Sciences, Jamia Millia Islamia, Jamia Nagar, New Delhi 110025, India.

<sup>2</sup>Department of Chemistry, Biochemistry and Forensic Science, Amity School of Applied Sciences, Amity University Haryana-122 413

<sup>3</sup> Centre of Medical and Bio-Allied Health Sciences Research, Ajman University, UAE.

<sup>4</sup>Department of Pharmacognosy College of Pharmacy, King Saud University, Riyadh, Saudi Arabia.

<sup>5</sup> Department of Biochemistry, Faculty of Sciences, Cancer and Mutagenesis Unit, King Fahd Medical Research Center, King Abdulaziz University, Jeddah 21589, Saudi Arabia.

\*Correspondence: [aislam@jmi.ac.in](mailto:aislam@jmi.ac.in) (A.I.)

\*To whom all correspondence should be addressed,

Asimul Islam, Ph.D.

Centre for Interdisciplinary Research in Basic Sciences

Jamia Millia Islamia, Jamia Nagar

New Delhi 110025, INDIA

Cell: +91-9312812007

E-mail: [aislam@jmi.ac.in](mailto:aislam@jmi.ac.in)

**Table S1. Different Physical and Chemical Properties of Trehalose**

| Parameter                                            | Value                                                                                                                                         |
|------------------------------------------------------|-----------------------------------------------------------------------------------------------------------------------------------------------|
| Chemical formula                                     | C <sub>12</sub> H <sub>22</sub> O <sub>11</sub> (anhydrous)<br>C <sub>12</sub> H <sub>22</sub> O <sub>11</sub> ·2H <sub>2</sub> O (dihydrate) |
| Molecular weight                                     | 342.3 g mol <sup>-1</sup> (anhydrous)<br>378.3 g mol <sup>-1</sup> (dihydrate)                                                                |
| Appearance                                           | White, odourless powder                                                                                                                       |
| Sweetness (relative)                                 | 45% that of sucrose                                                                                                                           |
| Polymorphs                                           | Two crystalline forms: anhydrous (T <sub>α</sub> , T <sub>β</sub> ) and dihydrate (T <sub>h</sub> ), one well-defined amorphous form          |
| Chemical nature                                      | Nonreducing disaccharide (α-D-glucopyranosyl-α-D-glucopyranoside)                                                                             |
| Relative density                                     | 1.22 g cm <sup>-3</sup> (at 25°C and weight fraction = 0.5)                                                                                   |
| Glass transition temperature                         | 117°C                                                                                                                                         |
| Thermostability                                      | >99% (120°C/90 min)                                                                                                                           |
| Melting point                                        | 203°C (anhydrous)<br>97°C (dihydrate)                                                                                                         |
| Heat of fusion                                       | 53.4 kJ mol <sup>-1</sup> (anhydrous)<br>57.8 kJ mol <sup>-1</sup> (dihydrate)                                                                |
| Hygroscopicity                                       | None at <90% RH                                                                                                                               |
| Solubility in water                                  | 68.9 g/100 g (at 20°C)                                                                                                                        |
| Freezing temperature (100 mg mL <sup>-1</sup> water) | -197°C                                                                                                                                        |
| Optical rotation                                     | [α] <sub>D</sub> = +178°C                                                                                                                     |
| Viscosity                                            | 8.2 cp (at 40°C and weight fraction = 0.5)                                                                                                    |
| Chemical reactivity                                  | Does not usually react with proteins                                                                                                          |
| Regulatory status                                    | GRAS (generally regarded as safe) by US FDA                                                                                                   |

RH, relative humidity.

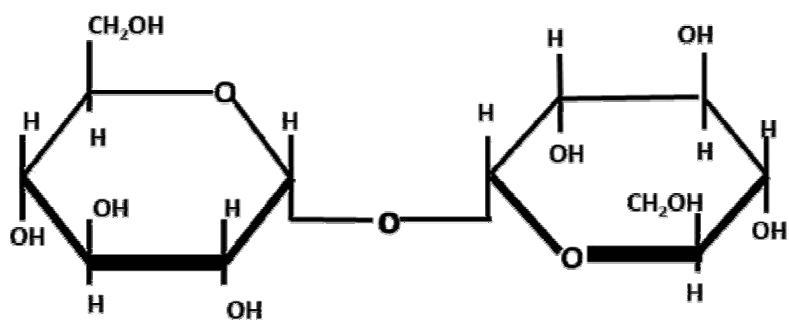

**Figure S1.** Structure of trehalose.

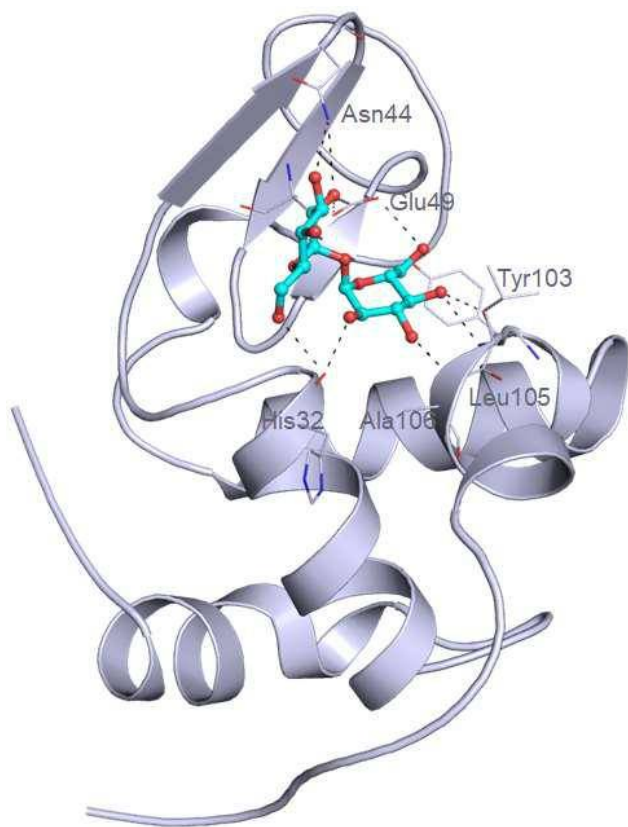

**Figure S2.** Diagrammatic representation of trehalose binding with alpha-lactalbumin with significant interactions offered.
